# Supplementary material
Source: PubMed Central journal article supplement (PMC8175070)
Supplement: NIHMS1702690-supplement-Supplementary_Information.pdf [file NIHMS1702690-supplement-Supplementary_Information.pdf]

**Supplementary information**

---

**Colchicine acts selectively in the liver to induce hepatokines that inhibit myeloid cell activation**

---

In the format provided by the authors and unedited

## **Supplementary Information**

### **Colchicine acts selectively in the liver to induce hepatokines that inhibit myeloid cell activation**

Jui-Hsia Weng<sup>\*</sup>, Peter David Koch, Harding Luan, Ho-Chou Tu, Kenichi Shimada, Iris  
Ngan, Richard Ventura, Ruomu Jiang, Timothy J. Mitchison<sup>\*</sup>

\* Corresponding author: [jui-hsia\\_weng@hms.harvard.edu](mailto:jui-hsia_weng@hms.harvard.edu) (J.-H.W)  
[timothy\\_mitchison@hms.harvard.edu](mailto:timothy_mitchison@hms.harvard.edu) (T.J.M.)

**This file includes supplementary information figures and legends.**

- Supplementary Figure. 1. Colchicine induces anti-inflammatory mediators.
- Supplementary Figure. 2. Colchicine activates JNK selectively in the liver.
- Supplementary Figure. 3. Oral colchicine administration induces GDF15 in the liver.
- Supplementary Figure. 4. The gating strategies for flow cytometry data analysis.

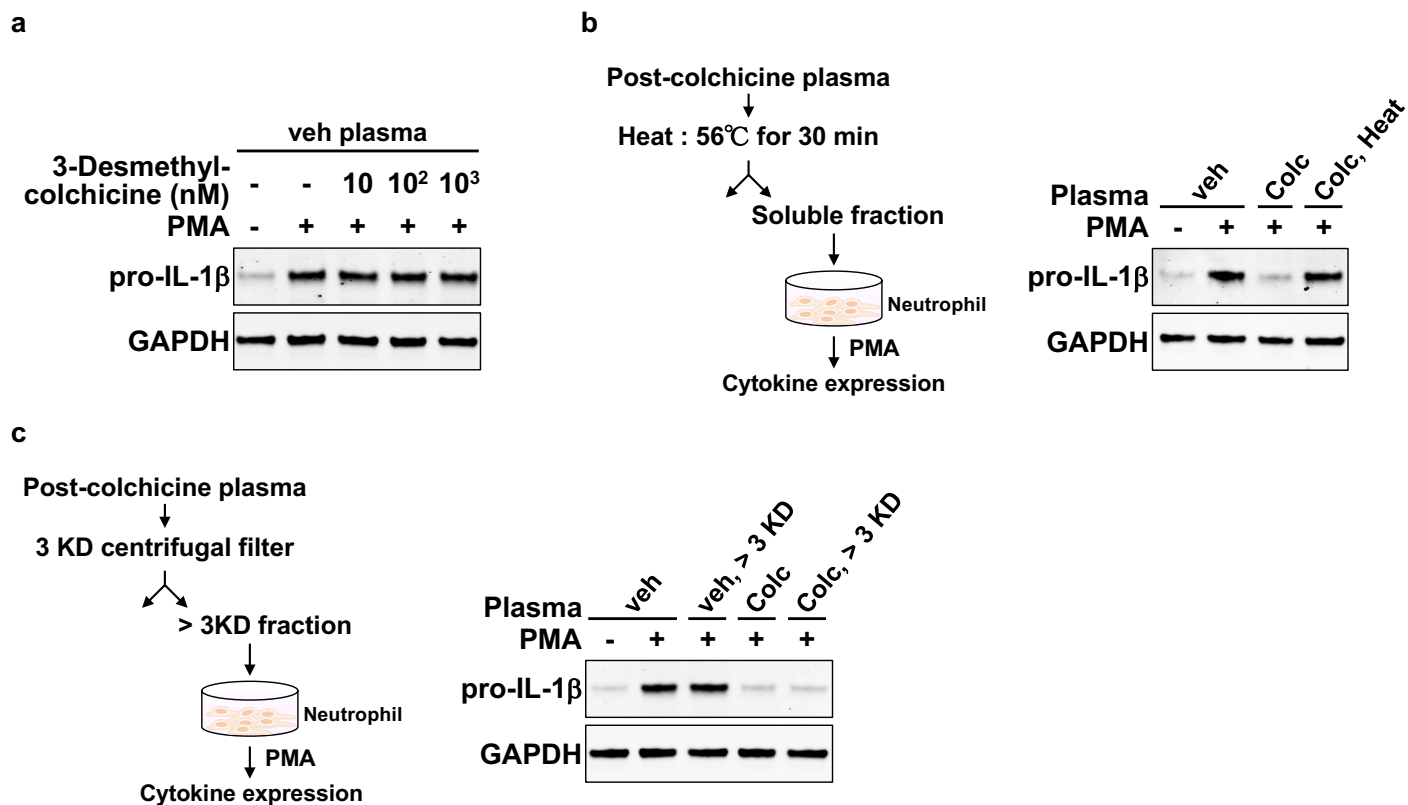

**Supplementary Figure 1. Colchicine induces anti-inflammatory mediators.**

*Ex vivo* expression of pro-IL-1 $\beta$  in primary neutrophils comparing effects of (a) the colchicine metabolite, 3-desmethylcolchicine, (b) heat-inactivated, and (c) size-fractionated plasma from colchicine-treated mice. veh plasma, plasma from vehicle-treated mice. Colc plasma, plasma from colchicine-treated mice.

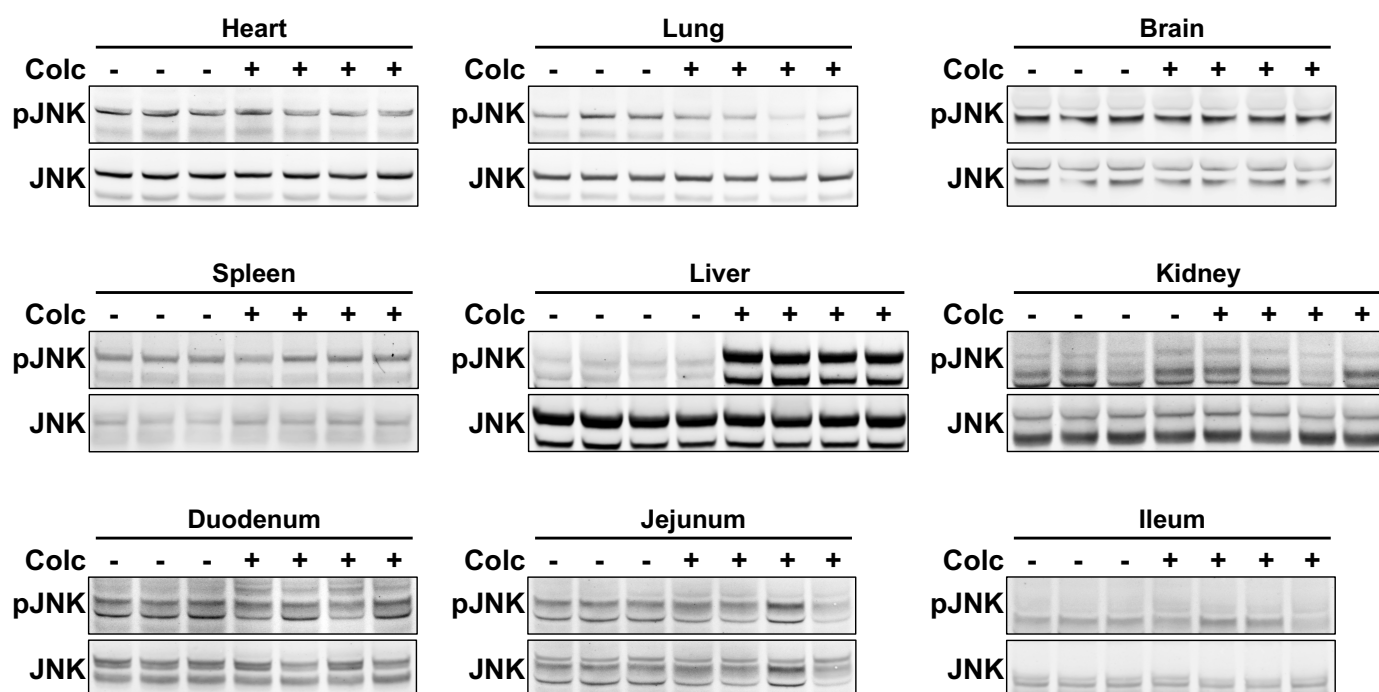

**Supplementary Figure 2. Colchicine activates JNK selectively in the liver.**

Tissues were collected 6 hours after vehicle or colchicine treatment. Phosphorylated and total JNK were detected by immunoblotting.

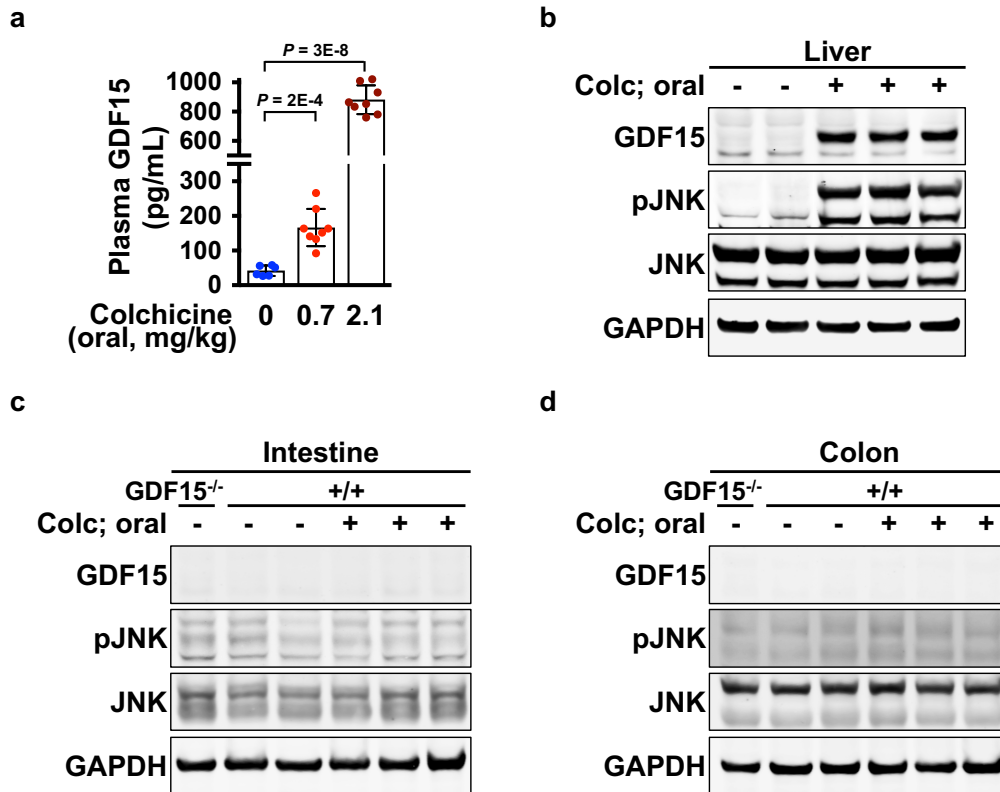

**Supplementary Figure 3. Oral colchicine administration induces GDF15 in the liver.**

Mice received vehicle or colchicine via the oral route and samples were collected 8 hours after administration. **(a)** Plasma GDF15 measured by ELISA analysis. Each dot represents one mouse. Data are represented as mean  $\pm$  s.d. Induction of GDF15 and phosphorylated JNK in mouse **(b)** livers, **(c)** intestines, and **(d)** colons detected by immunoblotting.

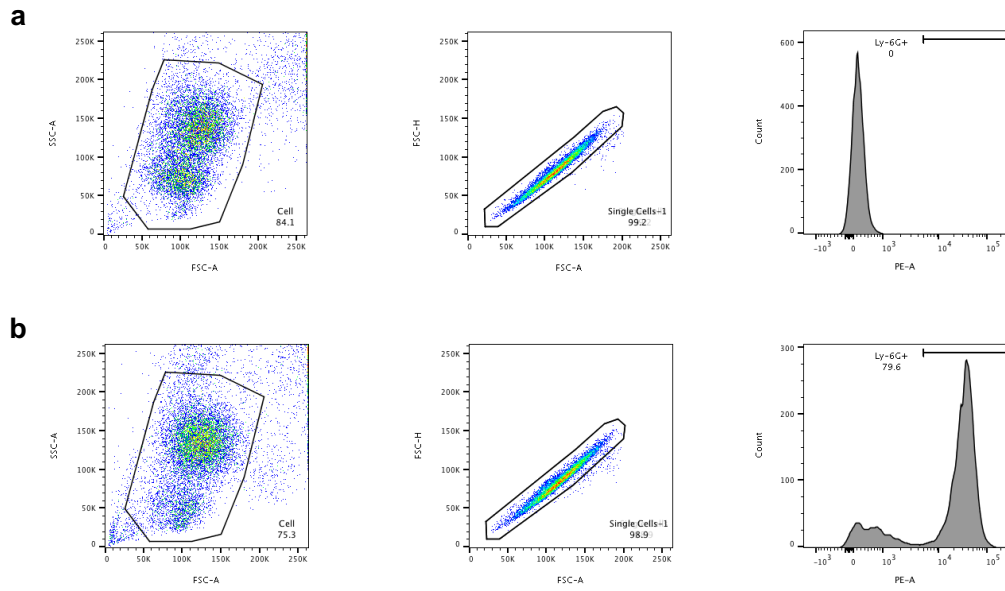

**Supplementary Figure 4. The gating strategies for flow cytometry data analysis. (a) The negative control using unstained cells. (b) The positive control.**
